# Supplementary material for: Improving the Antioxidant Properties of Calophyllum inophyllum Seed Oil from French Polynesia: Development and Biological Applications of Resinous Ethanol-Soluble Extracts
Source: PubMed Central journal article supplement (PMC7910904; doi:10.3390/antiox10020199), 2021-01-30

## Supplementary Information

### Improving the antioxidant properties of *Calophyllum inophyllum* L. seed oil from French Polynesia: development and biological applications of ethanol-soluble resins extracts

Mathieu Cassien <sup>1,2,3</sup>, Anne Mercier <sup>1</sup>, Sophie Thétiot-Laurent <sup>1</sup>, Marcel Culcasi <sup>1</sup>, Alice Asteian <sup>1</sup>, Emilie Ricquebourg <sup>1</sup>, Gaëtan Herbette <sup>4</sup>, Jean-Pierre Bianchini <sup>2</sup>, Phila Raharivelomanana <sup>2</sup> and Sylvia Pietri <sup>1,\*</sup>

1- Aix Marseille Univ, CNRS, ICR, UMR7273, Marseille, France

2- Univ Polynésie Française, IFREMER, ILM, IRD, EIO UMR241, Tahiti, Polynésie Française

3- YELEN Analytics, Ensuès-la-Redonne, France

4- Aix Marseille Univ, CNRS, Spectropole, FSCM, Marseille, France

#### \*Corresponding Author

S. Pietri, PhD

Aix Marseille Univ, CNRS, ICR, UMR7273, Institut de Chimie Radicalaire

*Sondes Moléculaires en Biologie et Stress Oxydant*, Service 522

Faculté des Sciences de Saint-Jérôme, Avenue Escadrille Normandie-Niemen

13397 Marseille Cedex 20 - France

Tel: 33 (0)4 13 94 58 07 - Fax: 33 (0)4 91 28 87 58

E-Mail: [sylvia.pietri@univ-amu.fr](mailto:sylvia.pietri@univ-amu.fr)

## Table of Contents

|                                                                                                        |    |
|--------------------------------------------------------------------------------------------------------|----|
| <b>1. <sup>1</sup>H-NMR Spectra of Isolated or Identified Phytoconstituents of Tamanu Resins</b> ..... | 2  |
| Figure S1: <sup>1</sup> H-NMR spectrum of inocalophyllin B .....                                       | 3  |
| Figure S2: <sup>1</sup> H-NMR spectrum of inophyllum C .....                                           | 3  |
| Figure S3: <sup>1</sup> H-NMR spectrum of inophyllum E .....                                           | 4  |
| Figure S4: <sup>1</sup> H-NMR spectrum of inophyllum P .....                                           | 4  |
| Figure S5: <sup>1</sup> H-NMR spectrum of calophyllolide .....                                         | 5  |
| Figure S6: <sup>1</sup> H-NMR spectrum of 12-oxocalanolide A .....                                     | 5  |
| Figure S7: <sup>1</sup> H-NMR spectrum of calanolide A .....                                           | 6  |
| Figure S8: <sup>1</sup> H-NMR spectrum of calanolide D .....                                           | 6  |
| Figure S9: <sup>1</sup> H-NMR spectrum of calanolide GUT 70 .....                                      | 7  |
| Figure S10: <sup>1</sup> H-NMR spectrum of tamanolide .....                                            | 7  |
| Figure S11: <sup>1</sup> H-NMR spectrum of tamanolide D .....                                          | 8  |
| Figure S12: <sup>1</sup> H-NMR spectrum of Fraction D .....                                            | 8  |
| Figure S13: <sup>1</sup> H-NMR spectrum of Fraction P .....                                            | 9  |
| <b>2. <sup>13</sup>C-NMR Spectra of some Isolated Phytoconstituents of Tamanu Resins</b> .....         | 9  |
| Figure S14: <sup>13</sup> C DEPT 135-NMR spectrum of inocalophyllin B .....                            | 9  |
| Figure S15: <sup>13</sup> C DEPT 135-NMR spectrum of calanolide A .....                                | 10 |
| Figure S16: <sup>13</sup> C DEPT 135-NMR spectrum of calanolide GUT 70 .....                           | 10 |
| Figure S17: <sup>13</sup> C DEPT 135-NMR spectrum of tamanolide D .....                                | 11 |
| <b>3. MS Analysis of Isolated Phytoconstituents of Tamanu Resins</b> .....                             | 11 |
| <b>4. EPR Spin Trapping</b> .....                                                                      | 12 |
| Scheme S1. Formation of HO• and O <sub>2</sub> •-/HOO• DEPMPO spin adducts .....                       | 12 |

# 1. <sup>1</sup>H-NMR Spectra of Isolated or Identified Phytoconstituents of Tamano Resins

Figure S1. <sup>1</sup>H-NMR spectrum of inocalophyllin B

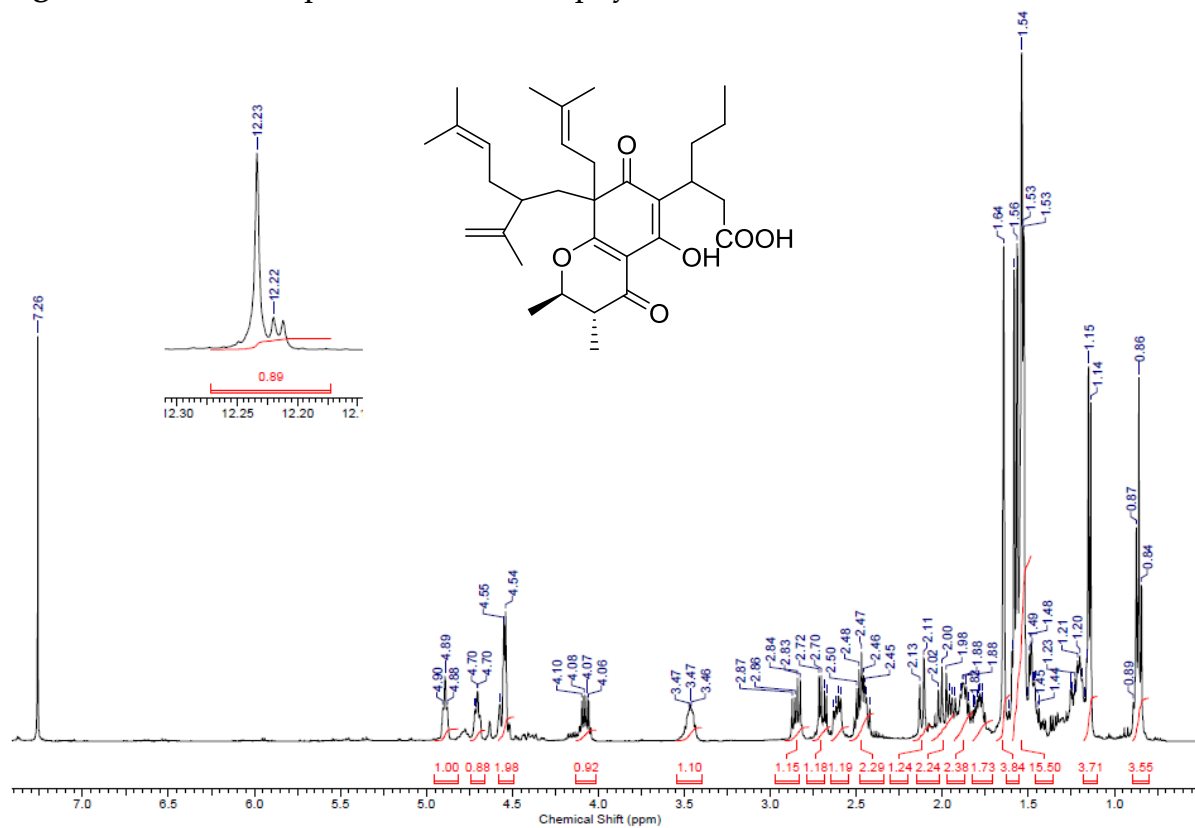

Figure S2. <sup>1</sup>H-NMR spectrum of inophyllum C

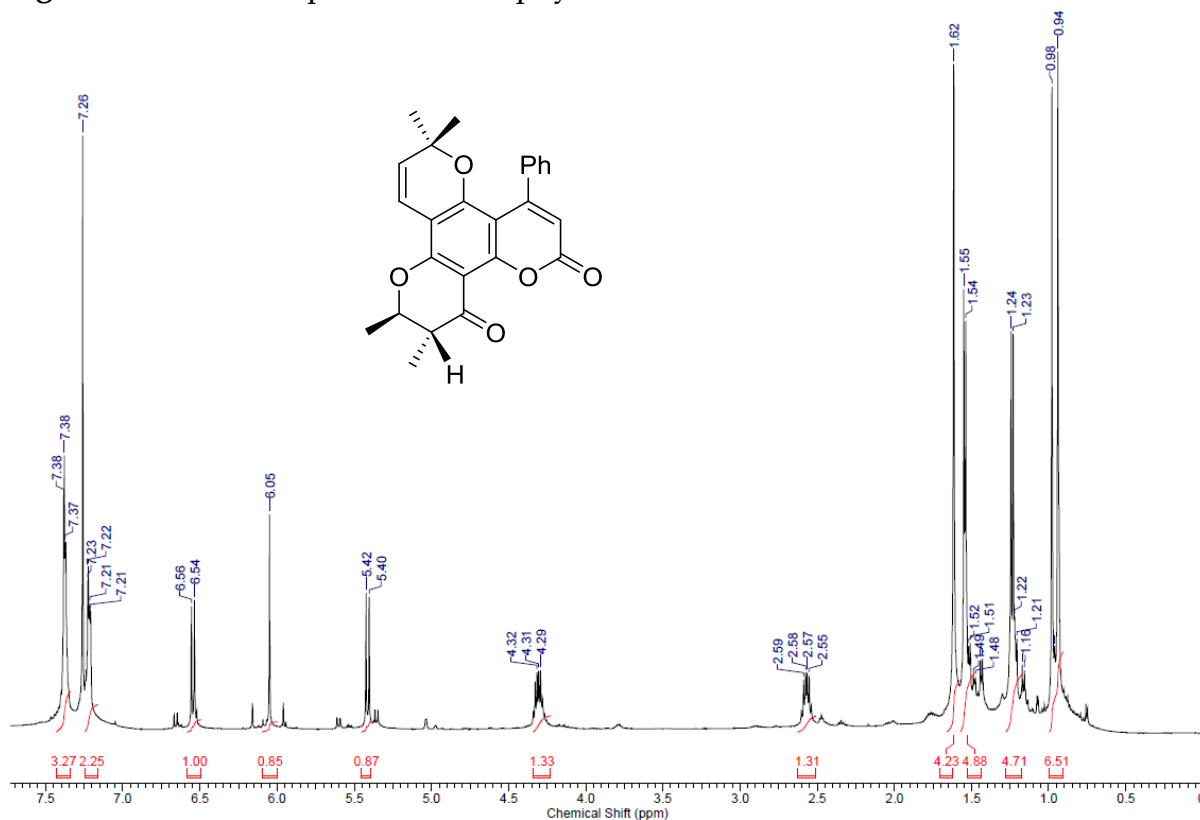

Figure S3. <sup>1</sup>H-NMR spectrum of inophyllum E

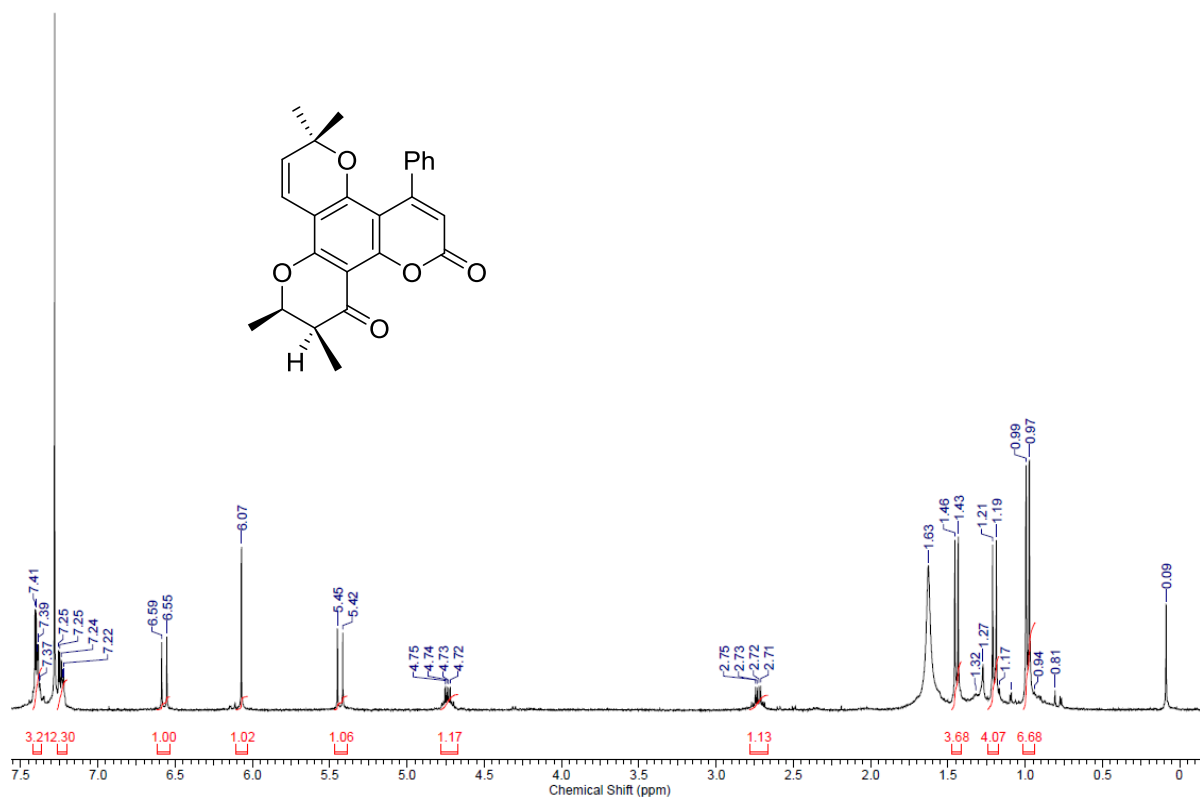

Figure S4. <sup>1</sup>H-NMR spectrum of inophyllum P

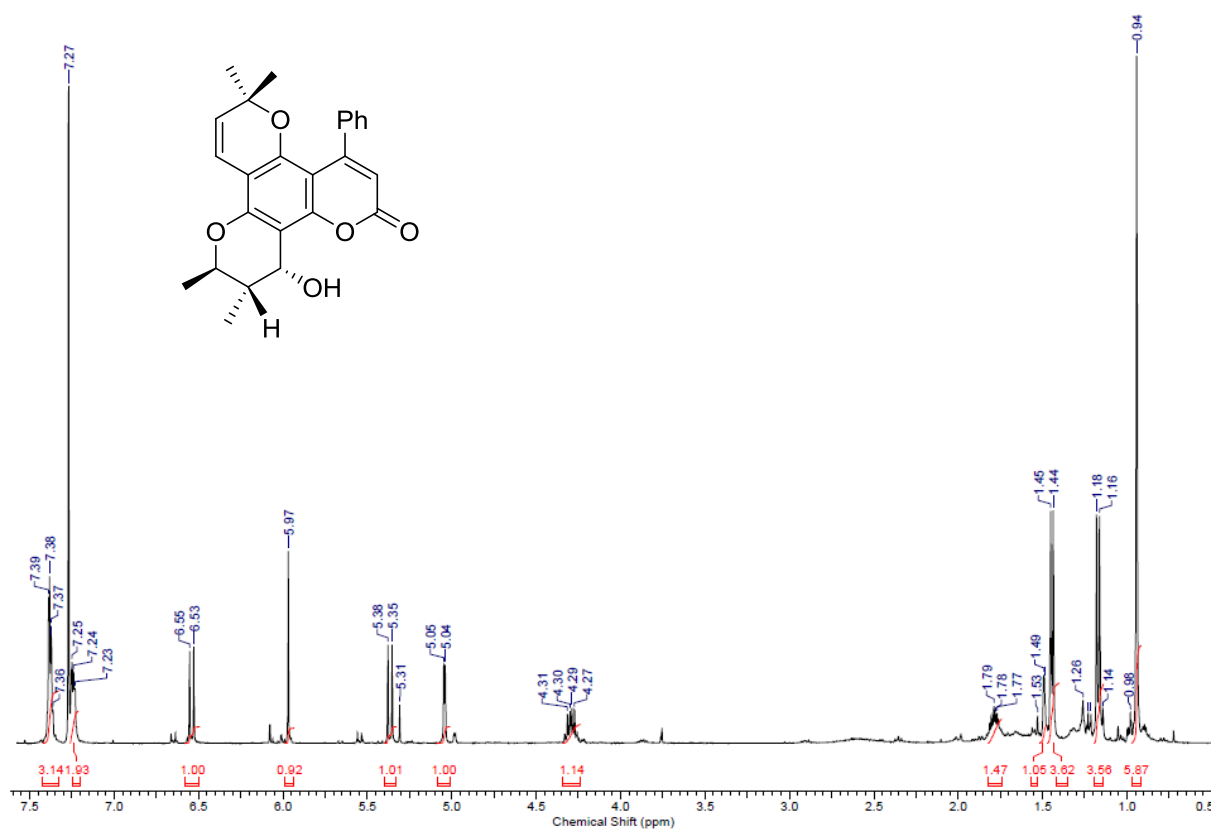

Figure S5. <sup>1</sup>H-NMR spectrum of calophyllolide

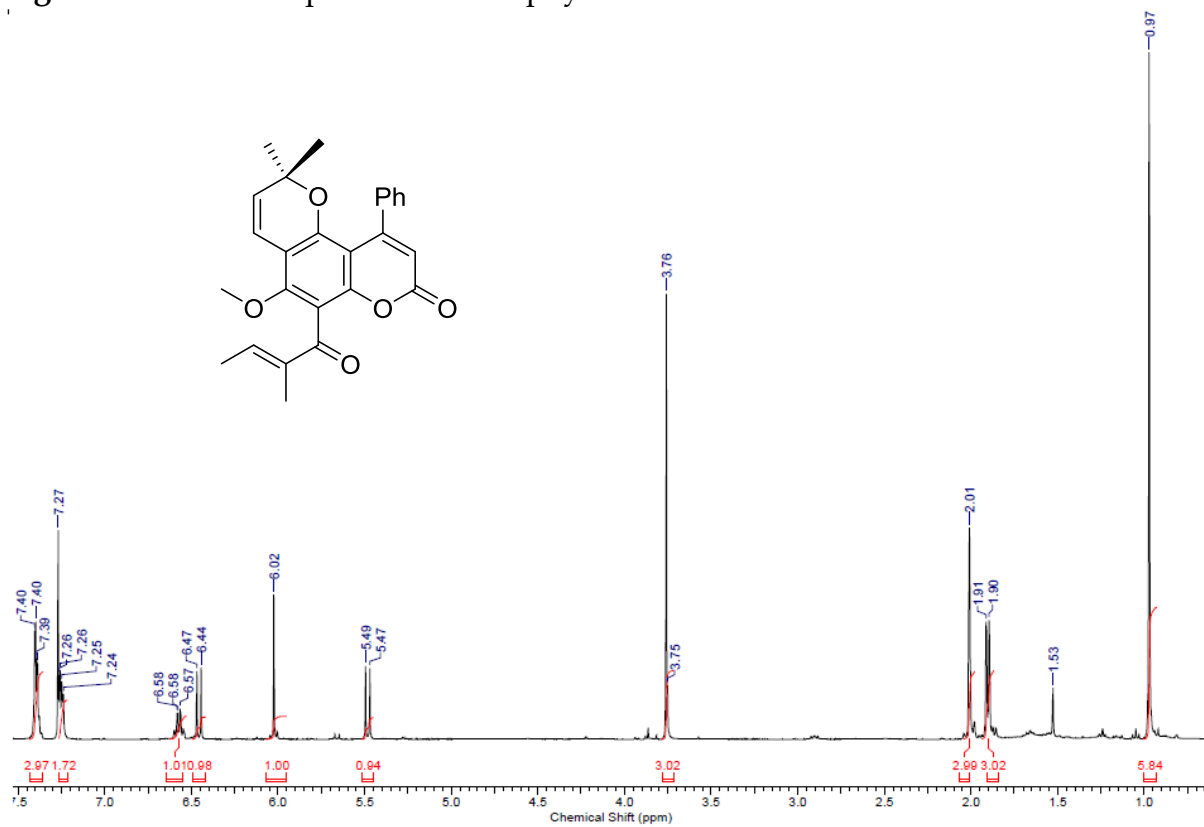

Figure S6. <sup>1</sup>H-NMR spectrum of 12-oxocalanolide A

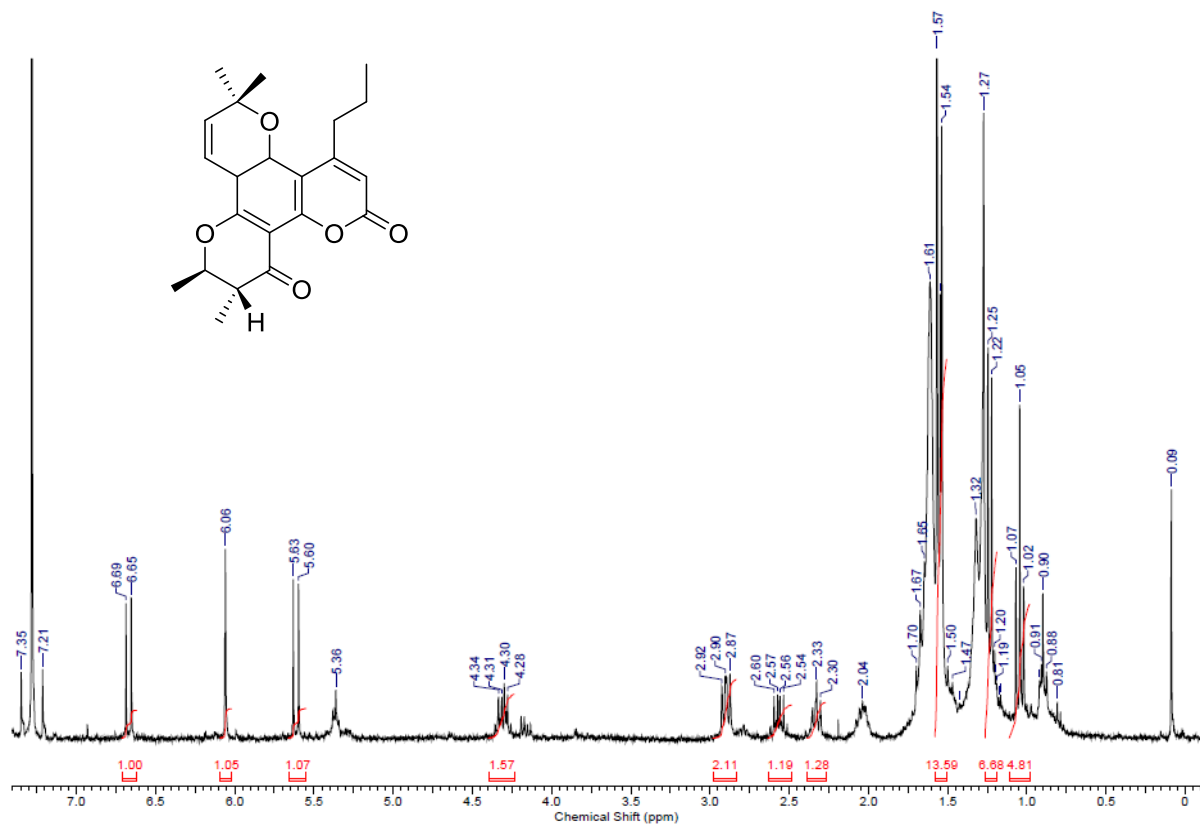

Figure S7. <sup>1</sup>H-NMR spectrum of calanolide A

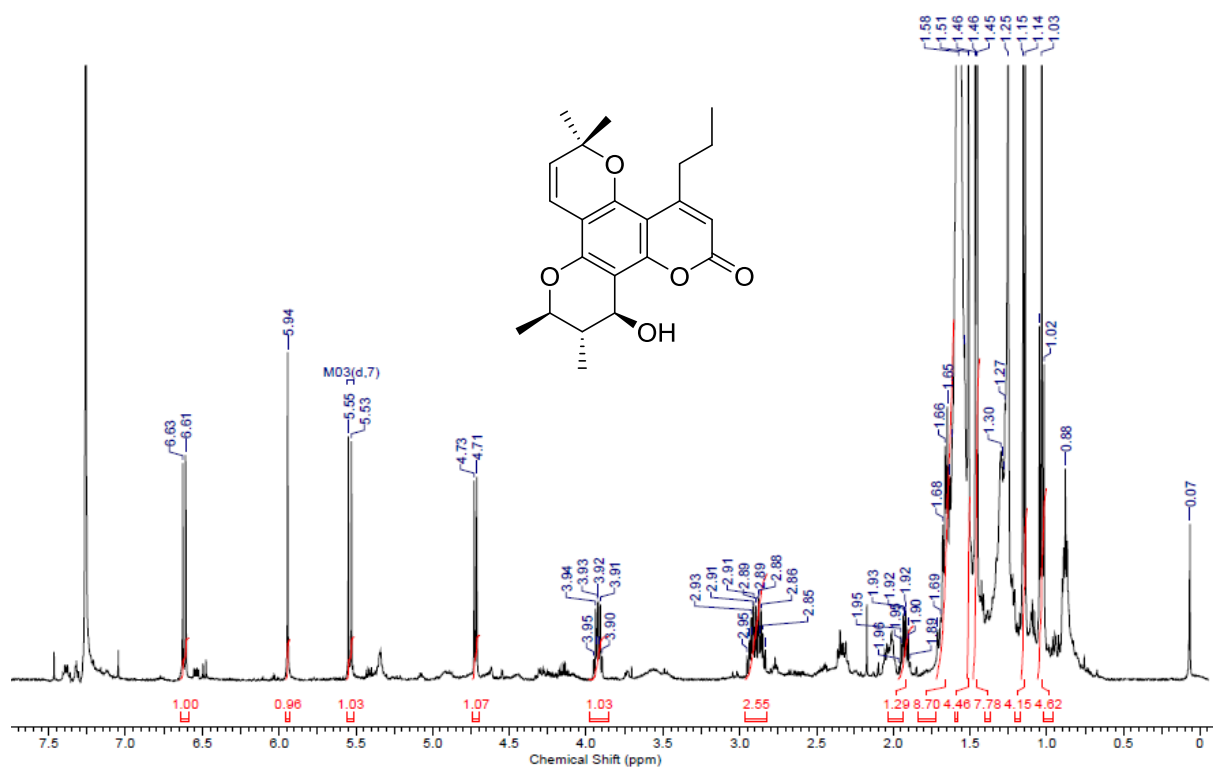

Figure S8. <sup>1</sup>H-NMR spectrum of calanolide D

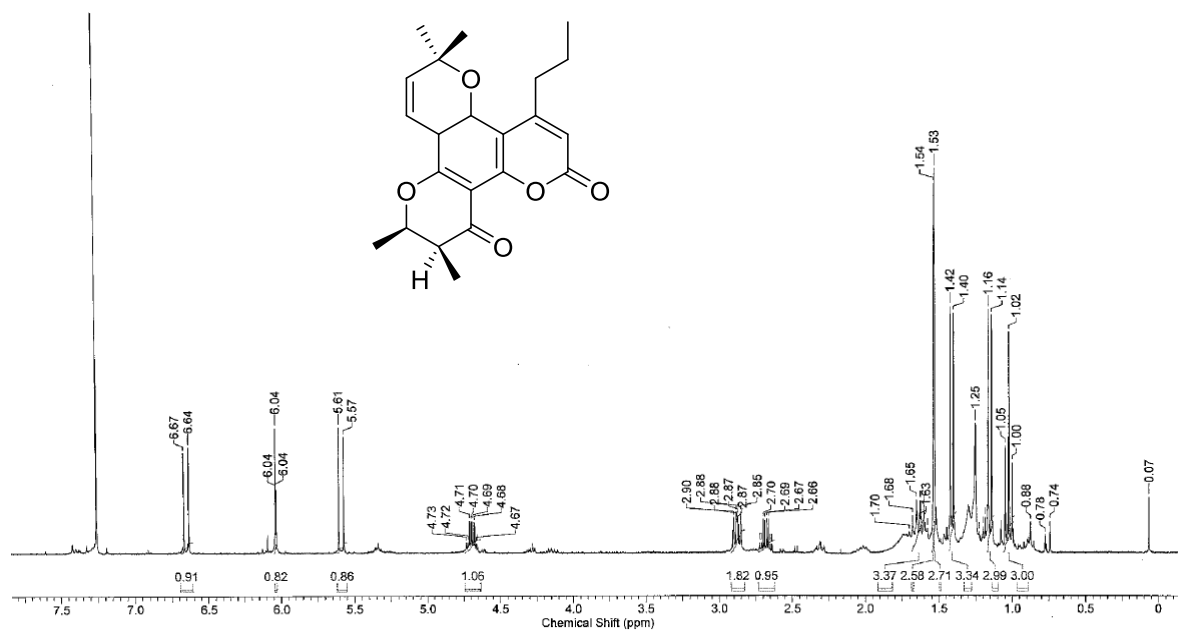

Figure S9. <sup>1</sup>H-NMR spectrum of calanolide GUT 70

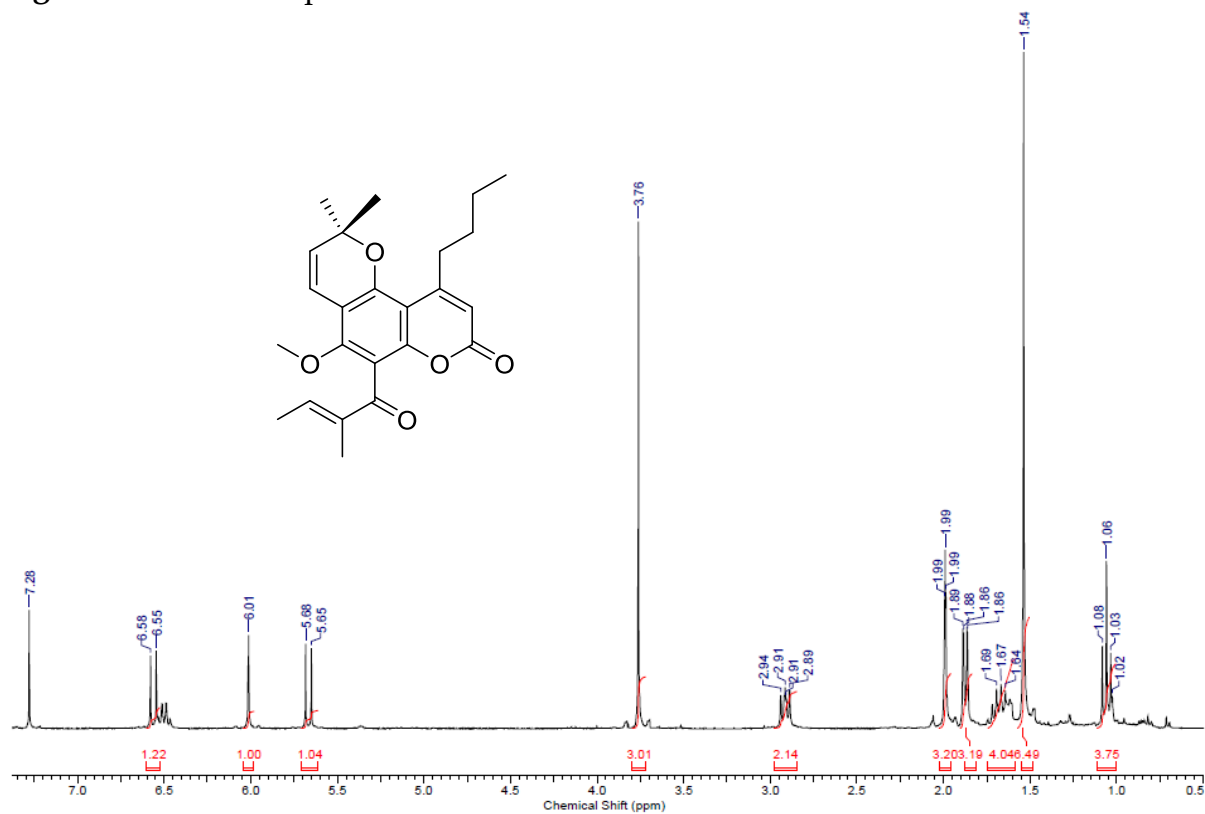

Figure S10. <sup>1</sup>H-NMR spectrum of tamanolide

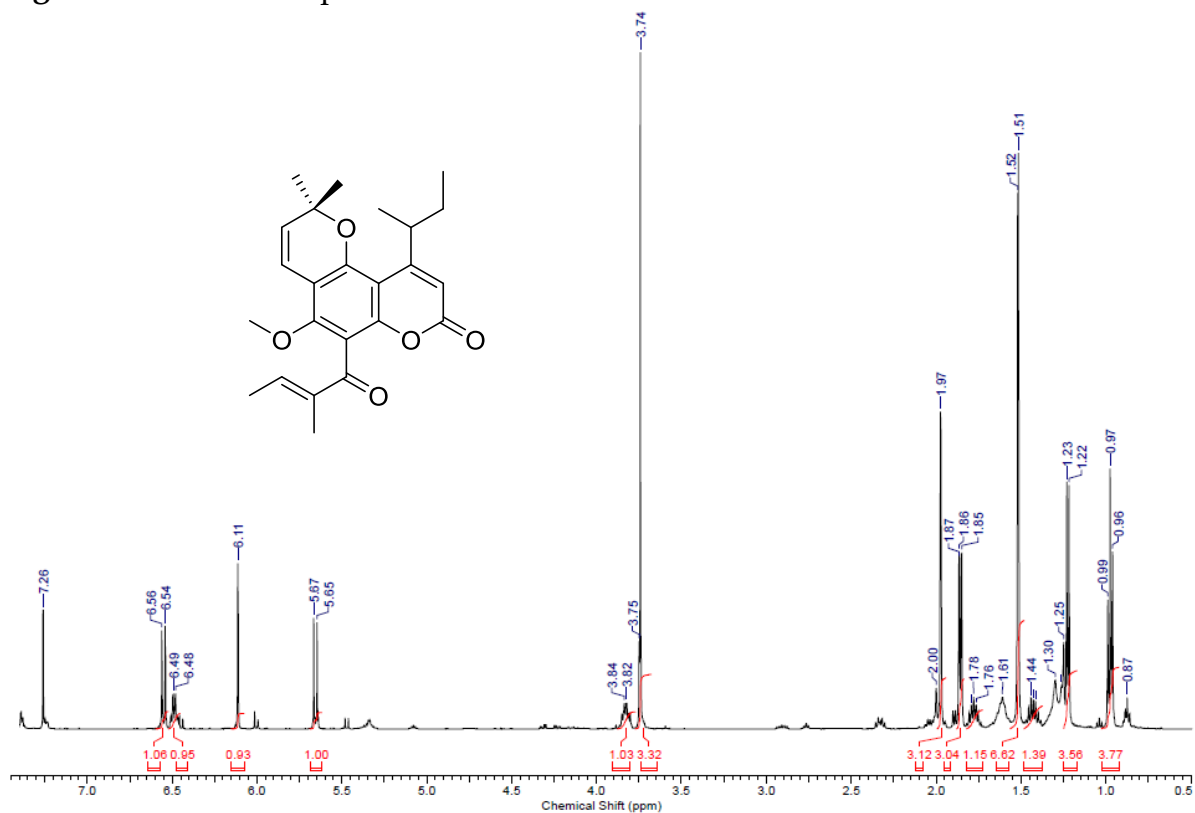

**Figure S11.**  $^1\text{H-NMR}$  spectrum of tamanolide D

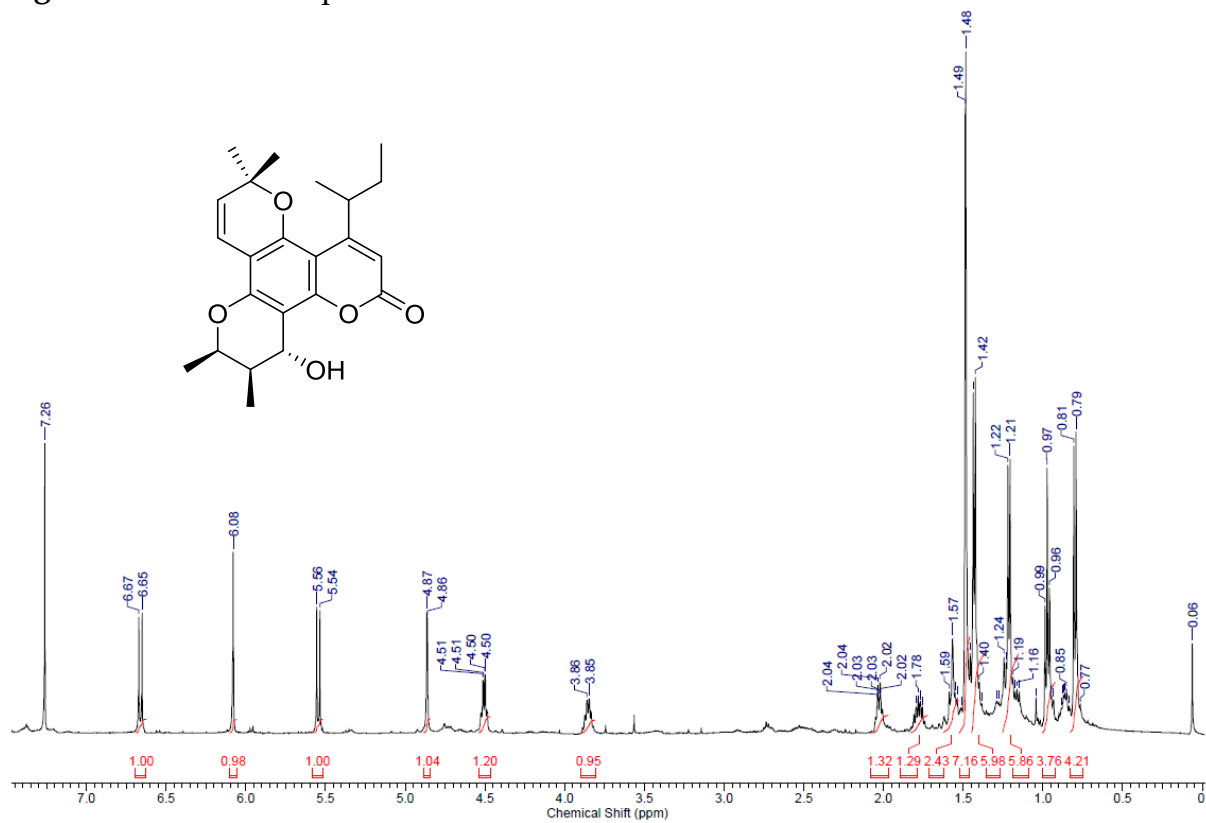

**Figure S12.**  $^1\text{H-NMR}$  spectrum of Fraction D

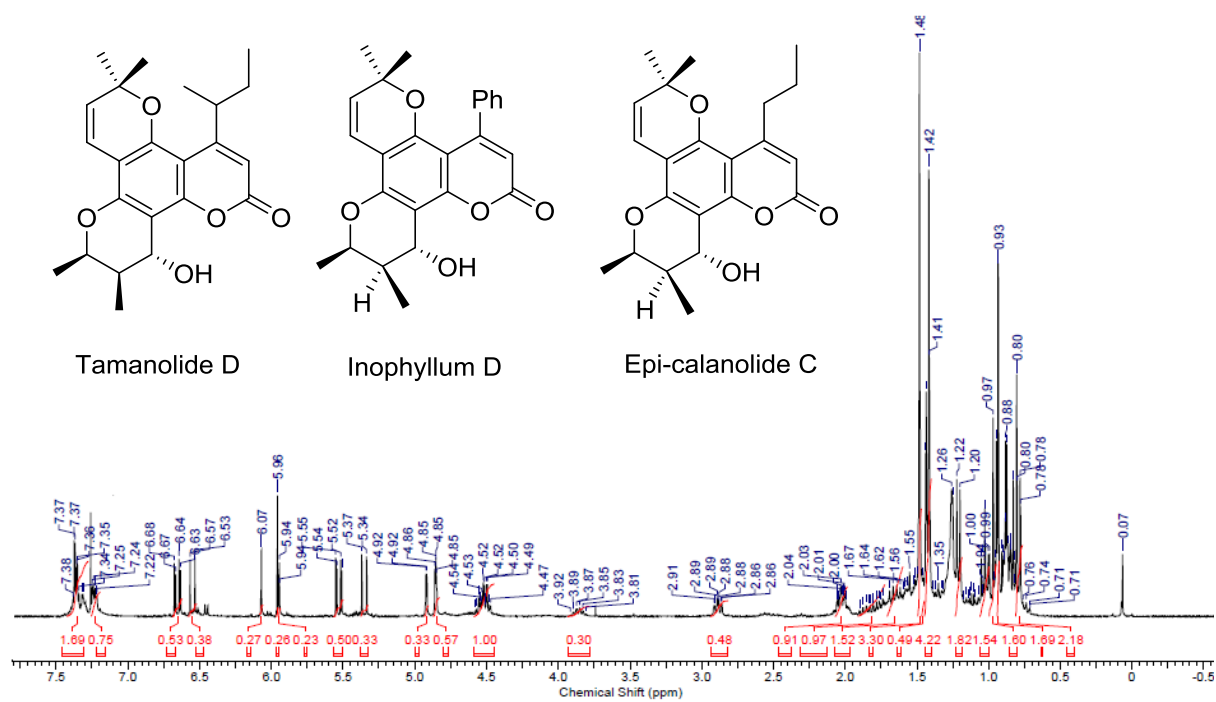



Figure S13. <sup>1</sup>H-NMR spectrum of Fraction P

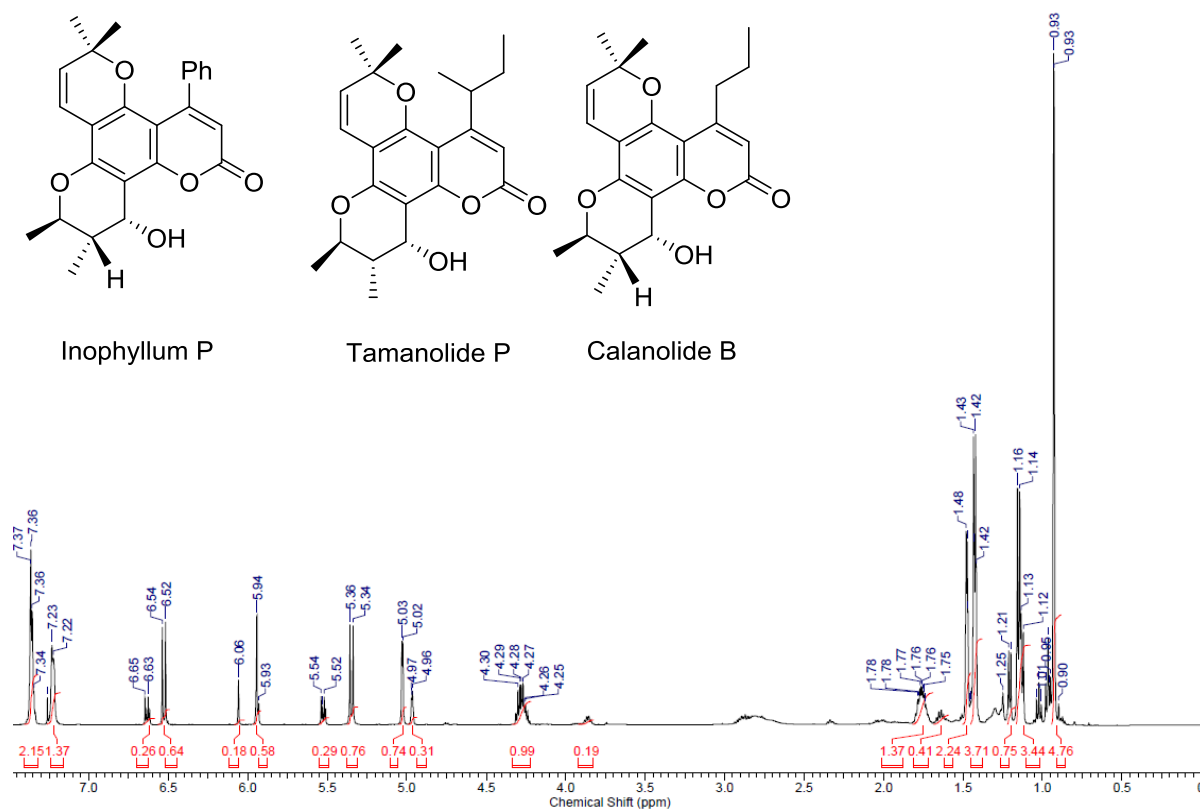

## 2. <sup>13</sup>C-NMR Spectra of some Isolated Phytoconstituents of Tamanu Resins

Figure S14. <sup>13</sup>C DEPT 135-NMR spectrum of inocalophyllin B

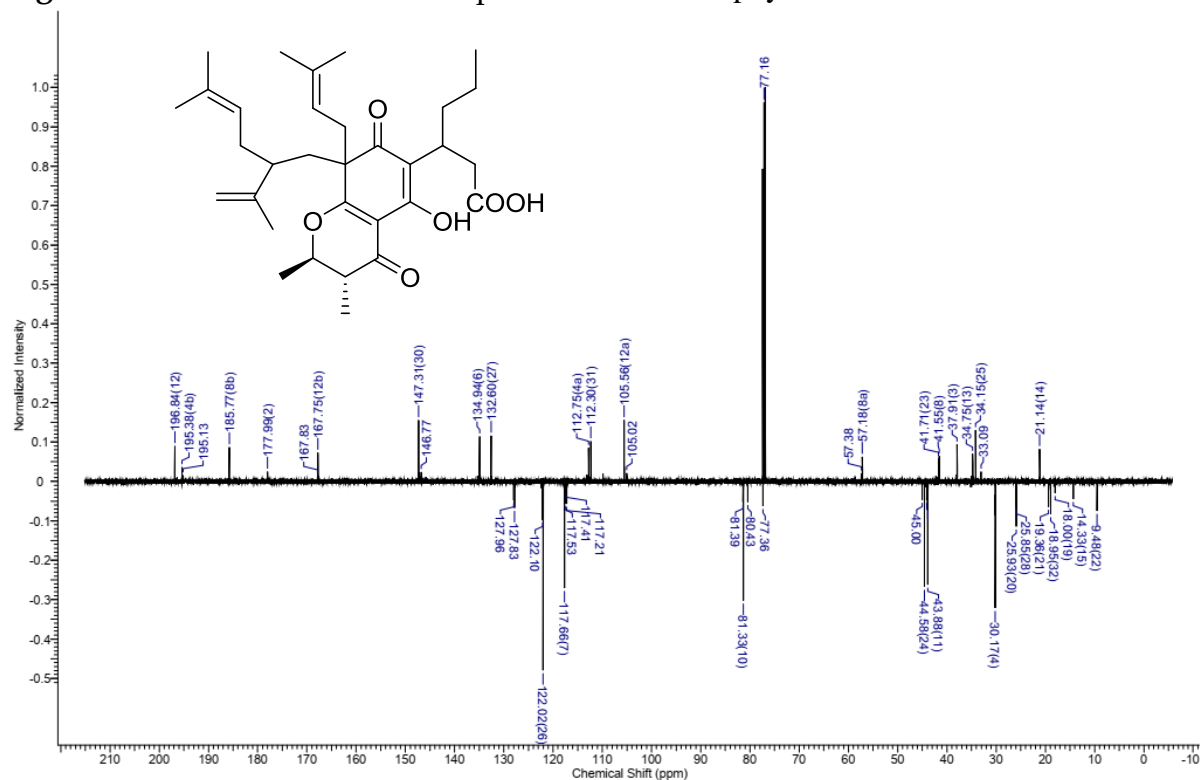

**Figure S15:**  $^{13}\text{C}$  DEPT 135-NMR spectrum of calanolide A

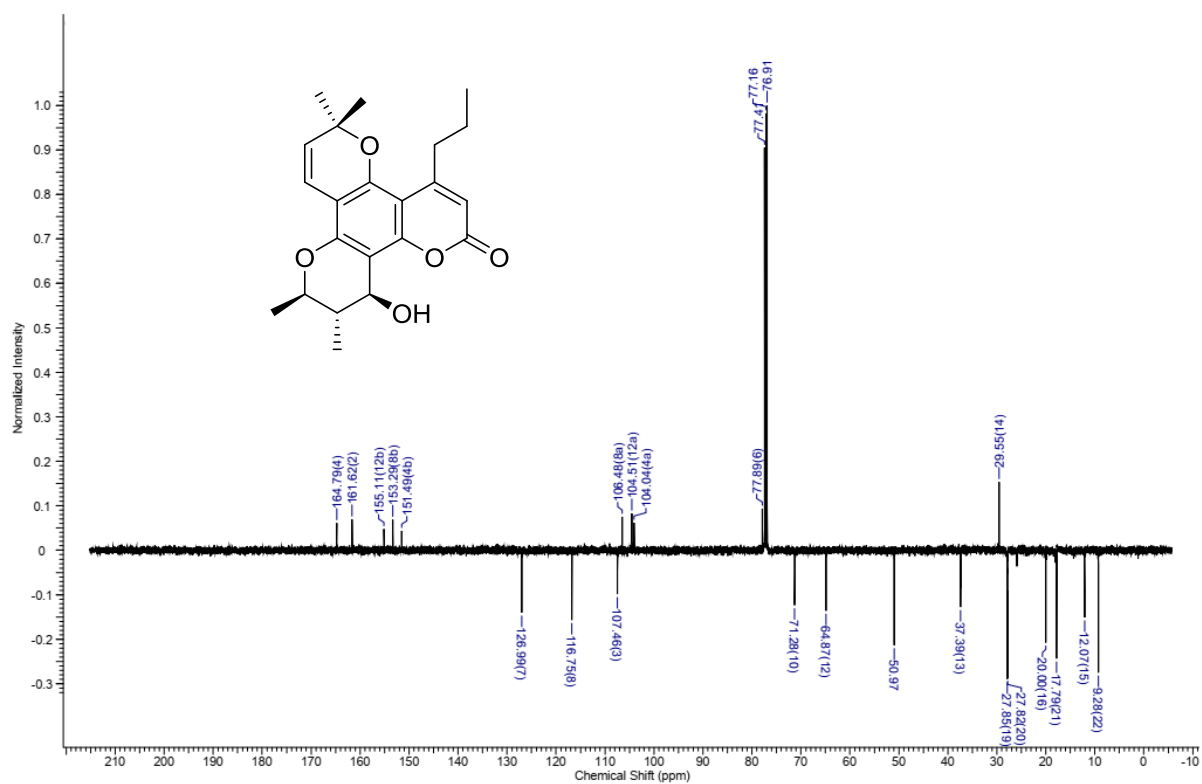

**Figure S16:**  $^{13}\text{C}$  DEPT 135-NMR spectrum of calanolide GUT 70

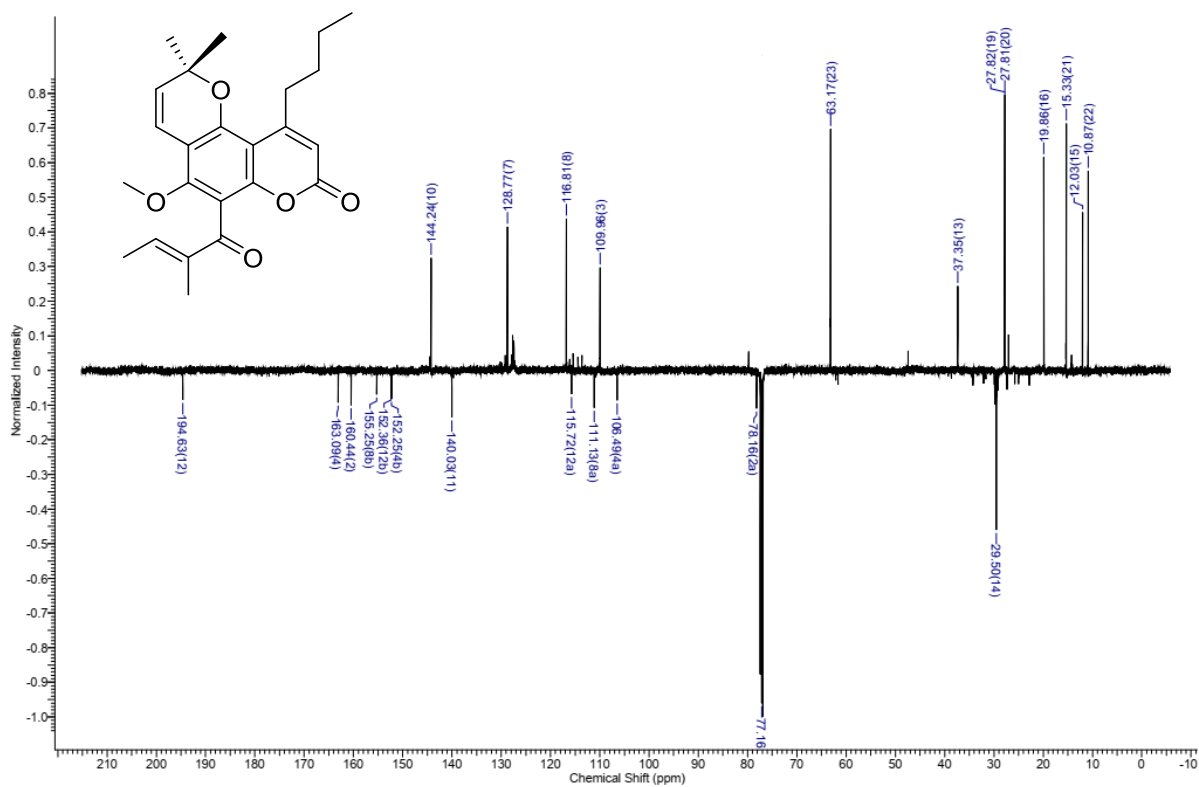

**Figure S17:**  $^{13}\text{C}$  DEPT 135-NMR spectrum of tamanolide D

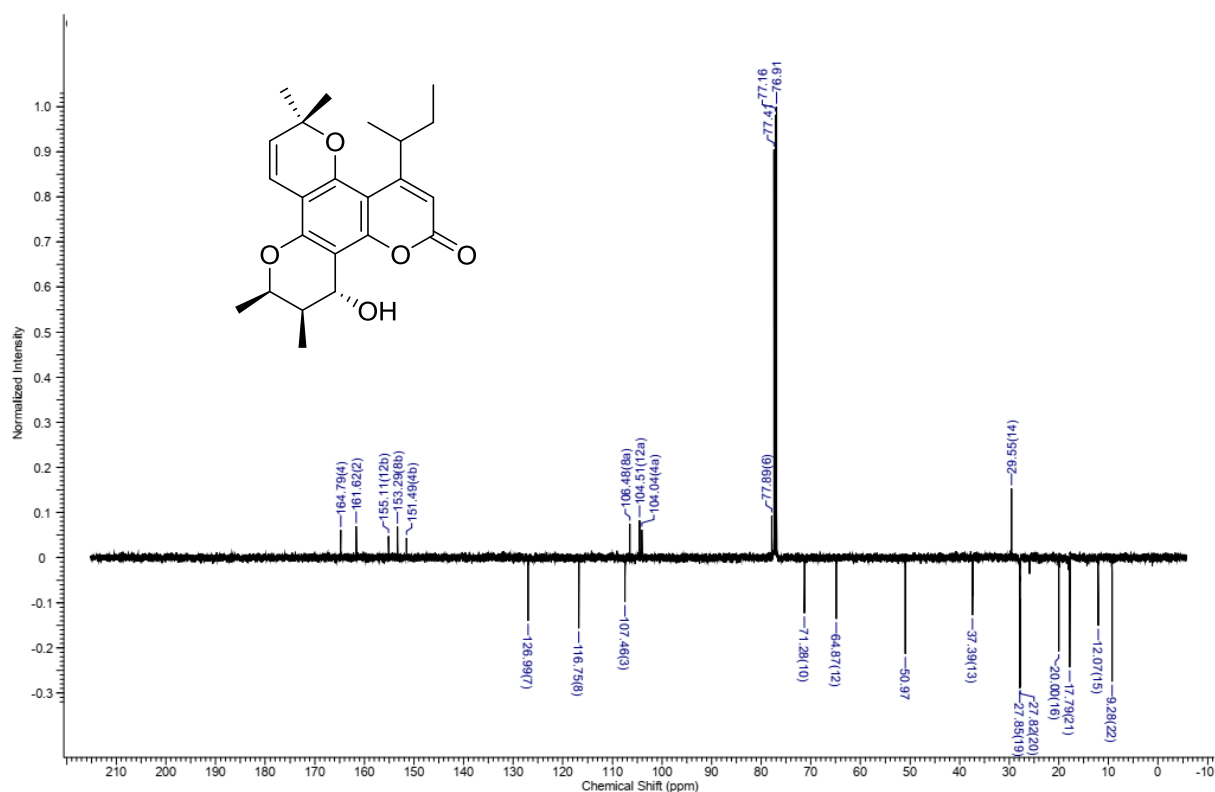

### 3. MS Analysis of Isolated Phytoconstituents of Tamanu Resins

The electron spray ionization mass spectra (ESI-MS) were recorded with a 3200 QTRAP (Applied Biosystems SCIEX) mass spectrometer in a positive ion mode to produce  $[\text{M} + \text{H}]^+$  ions (Spectropole, Aix Marseille Université, Marseille, France).

Incalophyllin B: ESI-MS ( $m/z$ ) 527.34 corresponding to  $[\text{C}_{32}\text{H}_{46}\text{O}_6 + \text{H}]^+$

Inophyllum C: ESI-MS ( $m/z$ ) 403.15 corresponding to  $[\text{C}_{25}\text{H}_{22}\text{O}_5 + \text{H}]^+$

Inophyllum E: ESI-MS ( $m/z$ ) 403.15 corresponding to  $[\text{C}_{25}\text{H}_{22}\text{O}_5 + \text{H}]^+$

Inophyllum P: ESI-MS ( $m/z$ ) 405.17 corresponding to  $[\text{C}_{25}\text{H}_{24}\text{O}_5 + \text{H}]^+$

Calophyllolide: ESI-MS ( $m/z$ ) 417.17 corresponding to  $[\text{C}_{26}\text{H}_{24}\text{O}_5 + \text{H}]^+$

12-oxocalanolide A: ESI-MS ( $m/z$ ) 369.17 corresponding to  $[\text{C}_{22}\text{H}_{24}\text{O}_5 + \text{H}]^+$

Calanolide A: ESI-MS ( $m/z$ ) 371.19 corresponding to  $[\text{C}_{22}\text{H}_{26}\text{O}_5 + \text{H}]^+$

Calanolide D: ESI-MS ( $m/z$ ) 369.17 corresponding to  $[\text{C}_{22}\text{H}_{24}\text{O}_5 + \text{H}]^+$

Calanolide GUT 70: ESI-MS ( $m/z$ ) 383.19 corresponding to  $[\text{C}_{23}\text{H}_{26}\text{O}_5 + \text{H}]^+$

Tamanolide: ESI-MS ( $m/z$ ) 397.19 corresponding to  $[\text{C}_{24}\text{H}_{28}\text{O}_5 + \text{H}]^+$

Tamanolide D: ESI-MS ( $m/z$ ) 385.20 corresponding to  $[\text{C}_{23}\text{H}_{28}\text{O}_5 + \text{H}]^+$

## 4. EPR Spin Trapping

### Scheme S1. Formation of HO• and (O<sub>2</sub>•<sup>-</sup>/HOO•) DEPMPO spin adducts

The main EPR coupling nuclei of the detected spin adducts are displayed in red. Stereochemistry is shown for the major *trans*-DEPMPO-OOH adduct.

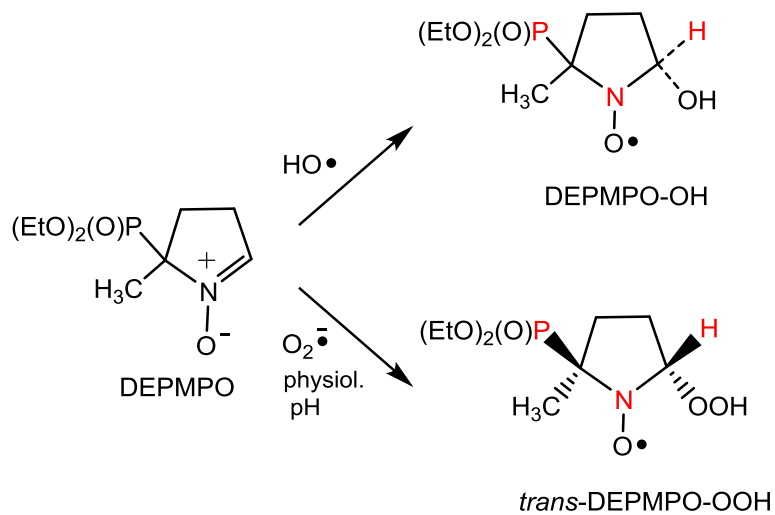

Supplement: antioxidants-10-00199-s001.pdf [file antioxidants-10-00199-s001.pdf]
